# Supplementary material for: Outcomes of Older Patients (≥60 years) with New-Onset Idiopathic Nephrotic Syndrome Receiving Immunosuppressive Regimen: A Multicentre Study of 116 Patients
Source: J Clin Med. 2019 Mar 2;8(3):298. doi: 10.3390/jcm8030298 (PMC6463053; doi:10.3390/jcm8030298)
Supplement: Supplementary file 1 [file jcm-08-00298-s001.pdf]

## Supplementary Materials

**Table S1.** Autoimmune diseases preceding the INS in 116 elderly.

| Autoimmune Diseases before SNI    | Number |
|-----------------------------------|--------|
| <b>Connective tissue diseases</b> |        |
| Lupus                             | 1      |
| Antiphospholipid syndrome         | 1      |
| Sjögren's disease                 | 1      |
| <b>Thyroid</b>                    |        |
| Immune-related hypothyroidism     | 3      |
| Graves' disease                   | 2      |
| <b>Intestinal/Liver</b>           |        |
| Colitis                           |        |
| Hepatitis                         | 1      |
| Sclerosing cholangitis            | 1      |
| <b>Others</b>                     |        |
| Biermer's disease                 | 1      |
| Guillain-Barre syndrome           | 1      |
| Graft versus host disease         | 1      |
| Type 2 cryoglobulinemia           | 1      |

**Table S2.** Infections requiring hospitalization during the follow-up.

| Infections             | N = 15 Patients | Death (n = 3) |
|------------------------|-----------------|---------------|
| <b>Bacterial</b>       |                 |               |
| Endocarditis           | 1               | 0             |
| Arthritis              | 1               | 0             |
| Prostatitis            | 1               | 0             |
| Pneumoniae             | 5               | 0             |
| Colitis                | 3               | 0             |
| Bacteremia             | 5               | 1             |
| Pyelonephritis         | 2               | 1             |
| Soft tissue infection  | 7               | 0             |
| Peritonitis            | 1               | 0             |
| Ascites infection      | 1               | 0             |
| <b>Viral</b>           |                 |               |
| CMV proliferation      | 1               | 0             |
| Influenza A            | 1               | 0             |
| Zoster virus           | 2               | 0             |
| <b>Fungal</b>          |                 |               |
| <i>Aspergillus</i> sp. | 1               | 1             |
| <i>Alternaria</i> sp.  | 1               | 0             |

**Table S3.** Cancers that developed more than 6 months after the onset of the INS.

| <b>Cancers</b>              | <b>N = 15</b> | <b>Time from the Onset of INS<br/>Median 32 Months (18–52)</b> |
|-----------------------------|---------------|----------------------------------------------------------------|
| <b>Urological</b>           |               |                                                                |
| Prostate                    | 4             | 62                                                             |
| Kidney                      | 1             | 34                                                             |
| Bladder                     | 1             | 18                                                             |
| Urinary tract               | 1             | 7                                                              |
| <b>Skin</b>                 |               |                                                                |
| Epidermoid carcinoma        | 2             | 36                                                             |
| <b>Intestinal</b>           |               |                                                                |
| Colon                       | 1             | 12                                                             |
| Stromal tumor               | 1             | 47                                                             |
| Rectum                      | 1             | 27                                                             |
| <b>B-cell proliferation</b> |               |                                                                |
| Macroglobulinemia           | 1             | 32                                                             |
| B-cell lymphoma             | 1             | 19                                                             |
| <b>Others</b>               |               |                                                                |
| Breast                      | 1             | 18                                                             |
| Epidermoid ENT              | 1             | 52                                                             |
